# Supplementary material for: WO3/Pt photocatalyst supported by a ceramic filter for indoor air purification under visible light irradiation
Source: Royal Society of Chemistry journal article supplement (doi:10.1039/d4va00188e), 2024-01-01
Supplement: d4va00188e1.pdf [file d4va00188e1.pdf]

## WO<sub>3</sub>/Pt photocatalyst supported by ceramic filter for indoor air purification under visible light irradiation

Sudipto Pal <sup>†,\*</sup>, Amruth Kaitheri <sup>†</sup>, Sanosh Kunjalukkal Padmanabhan <sup>†</sup>, Massimo Catalano <sup>‡,§</sup>,  
Stefano Perboni <sup>§</sup>, and Antonio Licciulli <sup>†</sup>

<sup>†</sup> Department of Engineering for Innovation, Campus Ecotekne, University of Salento, Via per Monteroni, 73100 Lecce, Italy

<sup>‡</sup> Department of Mathematics and Physics “Ennio De Giorgi”, University of Salento, Via Arnesano, 73100 Lecce, Italy

<sup>§</sup> Institute for Microelectronics and Microsystems (IMM), CNR, Via Monteroni, 73100 Lecce, Italy

<sup>§</sup> Nanohub Srl, Via Borgonuovo 9, 20121 Milano, Italy

\* Corresponding author, Email: [sudipto.pal@unisalento.it](mailto:sudipto.pal@unisalento.it)

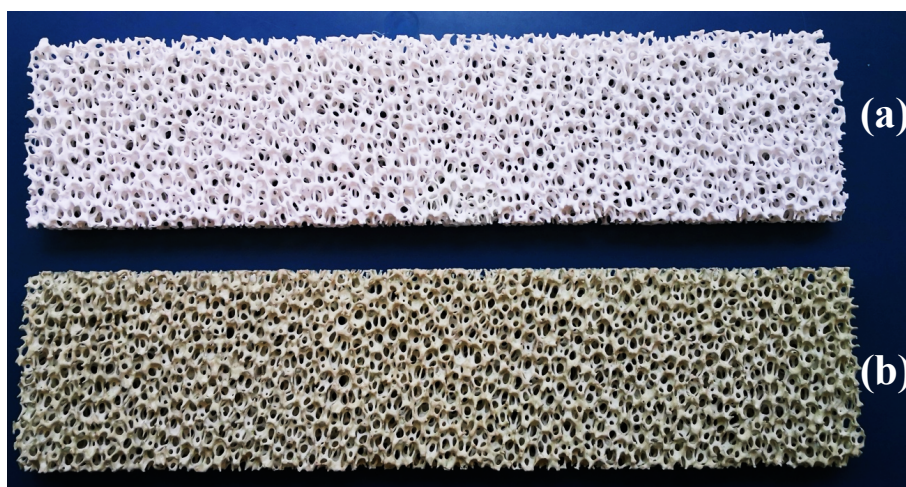

**Fig. S1.** Digital Photographs of the (a) uncoated and (b)  $\text{WO}_3/\text{Pt}$  coated ceramic foam filter (dimension: 30 cm x 7 cm x 1.5 cm).

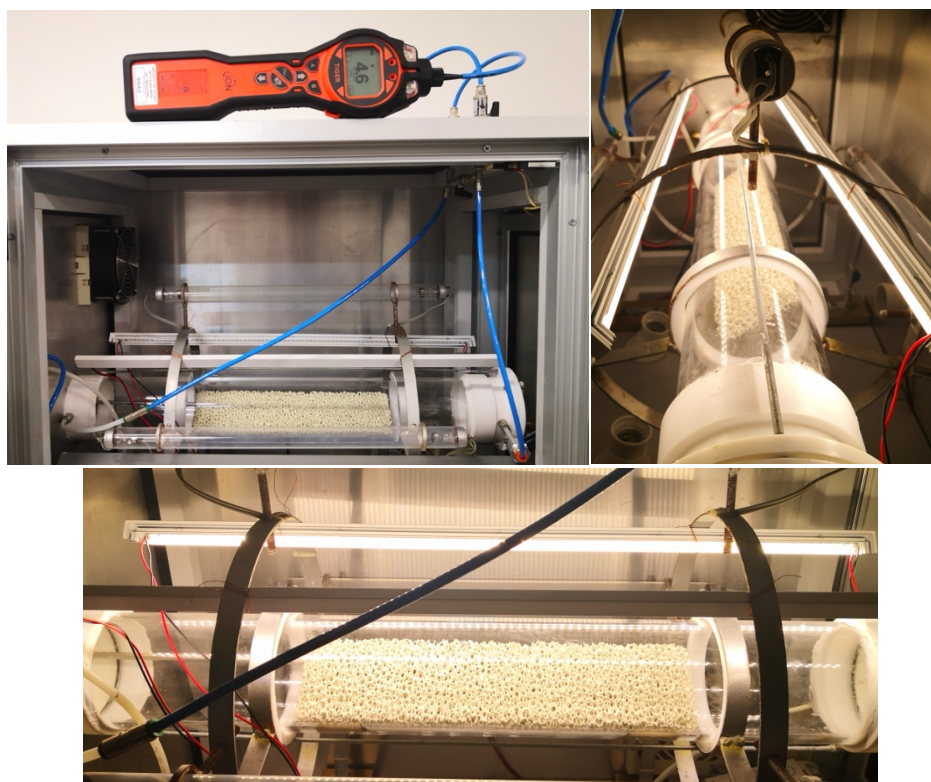

**Fig. S2.** Digital Photographs of the experimental set up and the photoreactor for toluene photodegradation.

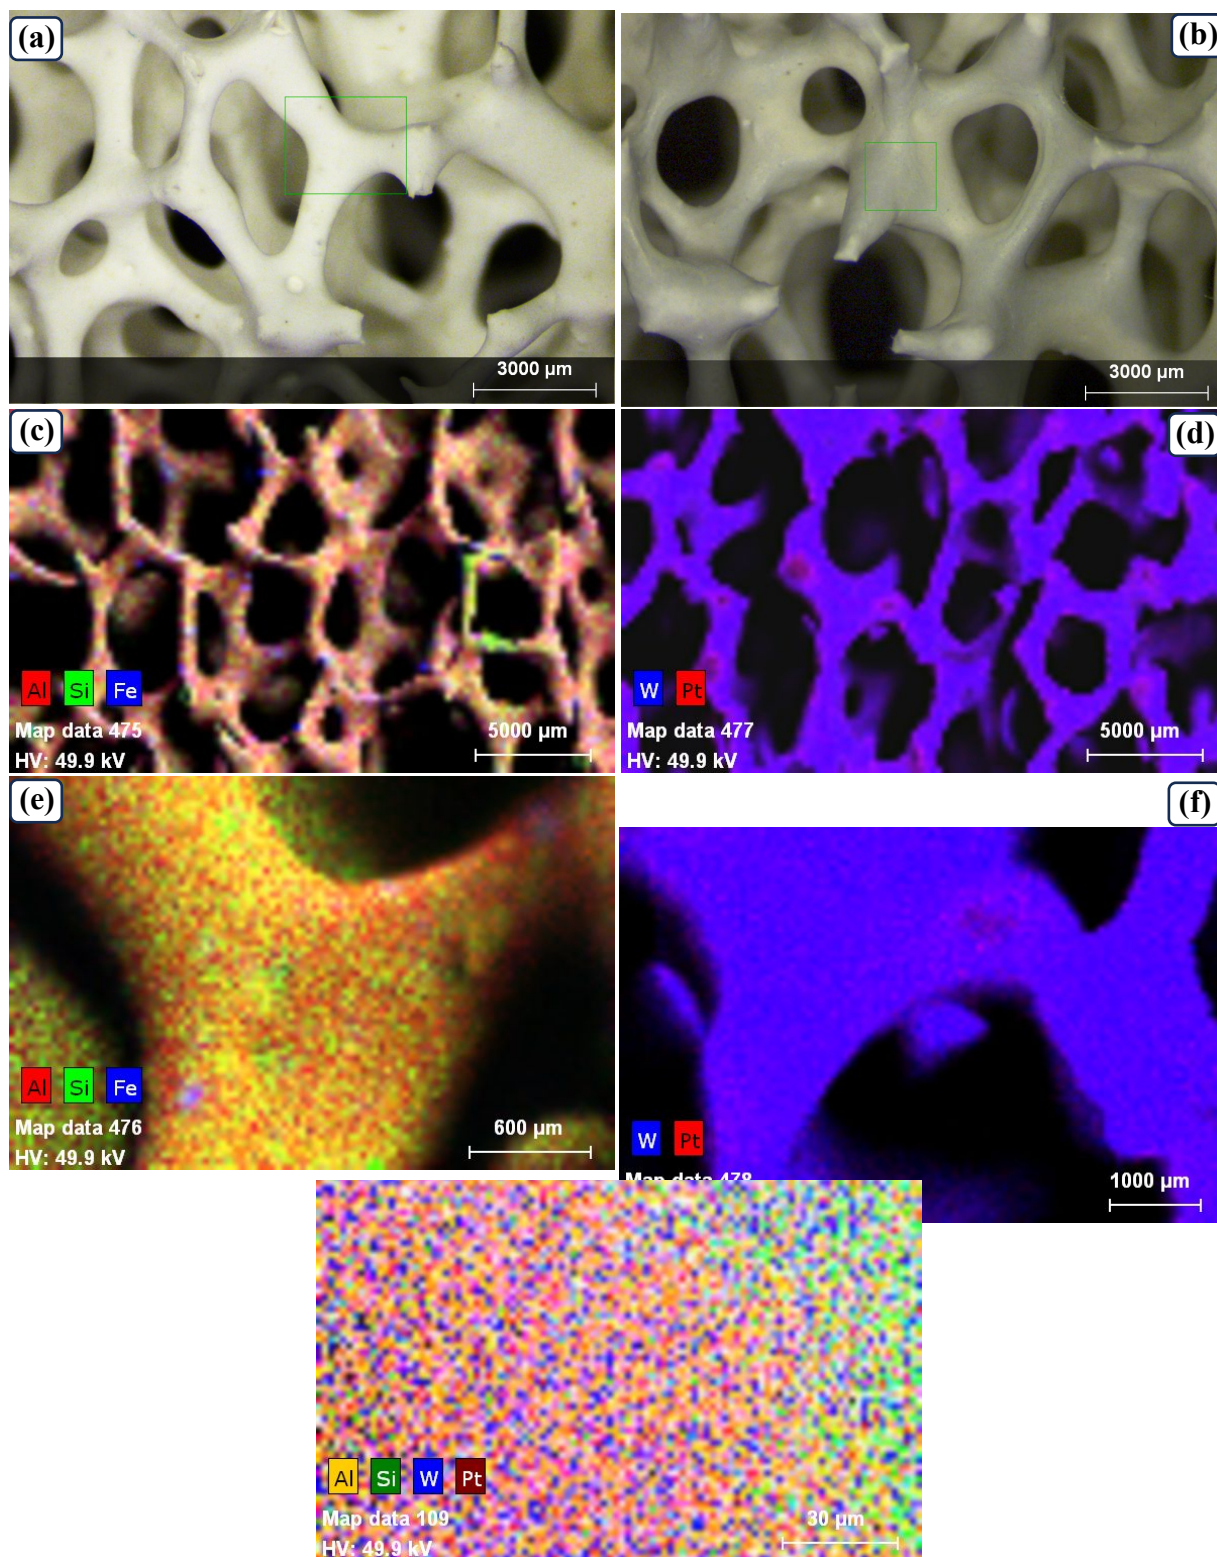

**Fig. S3.** Elemental distribution by XRF analyses; images of (a) uncoated and (b) WO<sub>3</sub>/Pt coated CFF captured by the internal camera of the instrument. (c, e) distribution of the principal elements of the uncoated CFF and (d, f, g) Distribution of W and Pt on the coated CFF at different magnification.

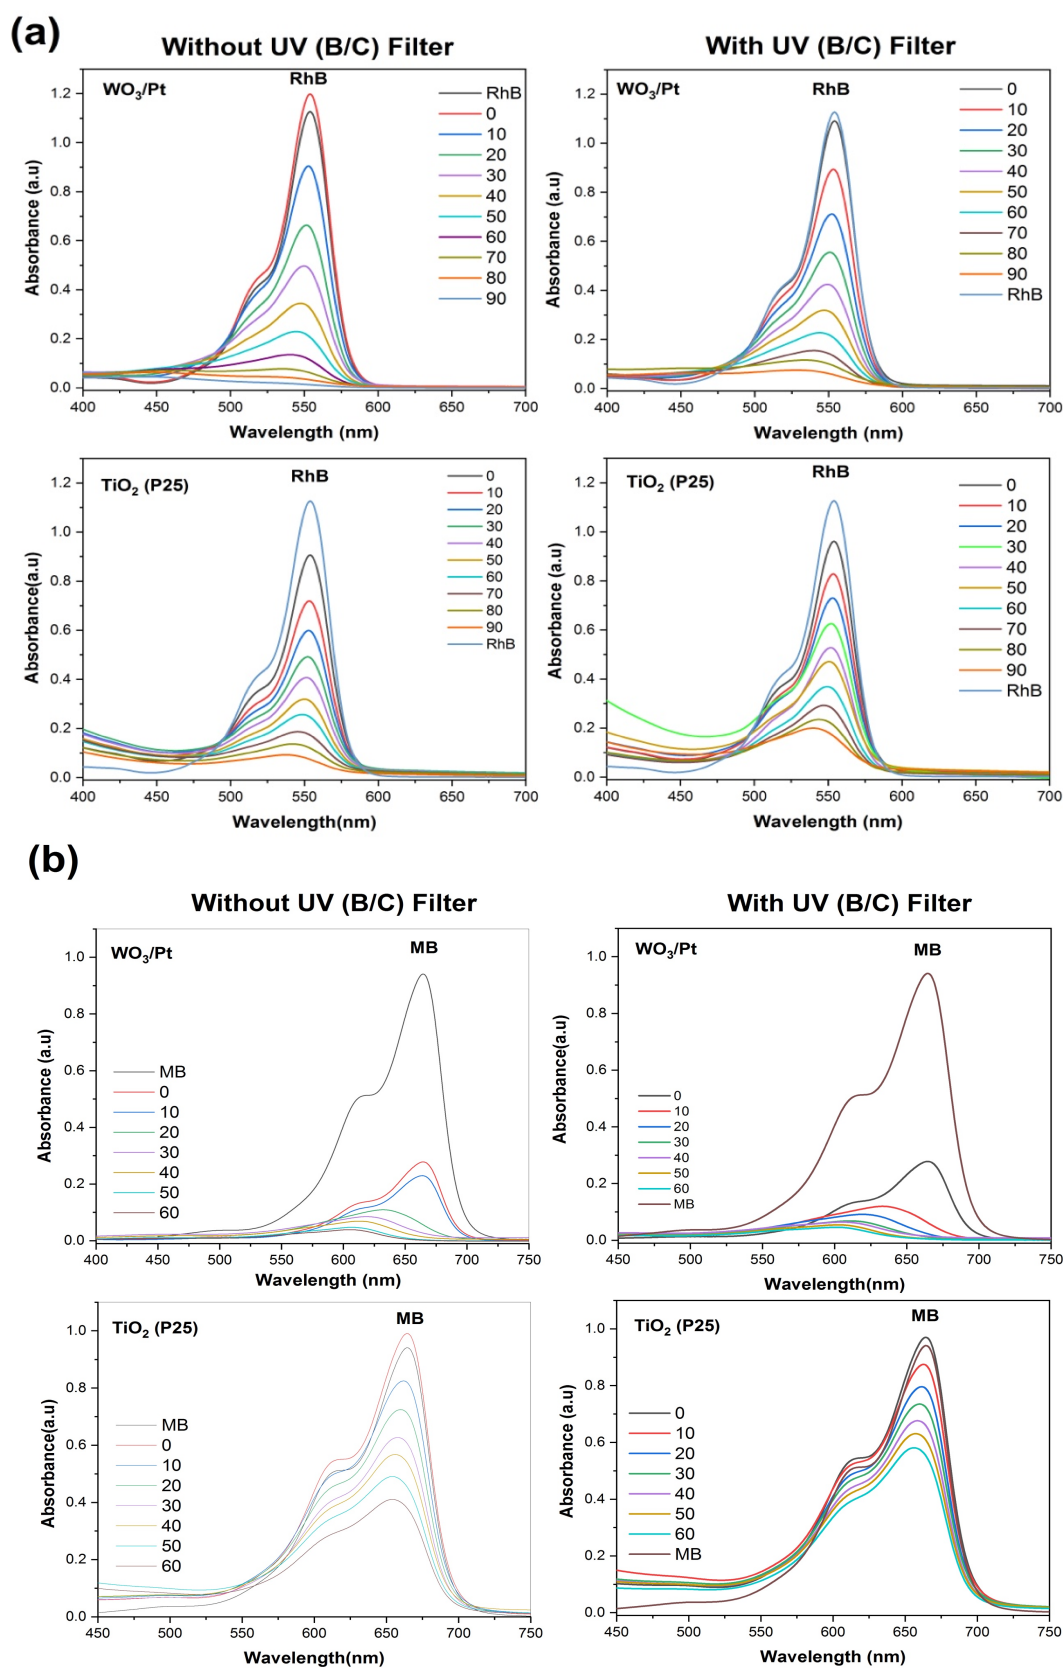

**Fig. S4.** UV-visible absorption spectra of (a) RhB, and (b) MB dye solutions as a function of solar light irradiation with WO<sub>3</sub>/Pt and TiO<sub>2</sub> (P25) photocatalysts with and without using the UVB/UVC filter

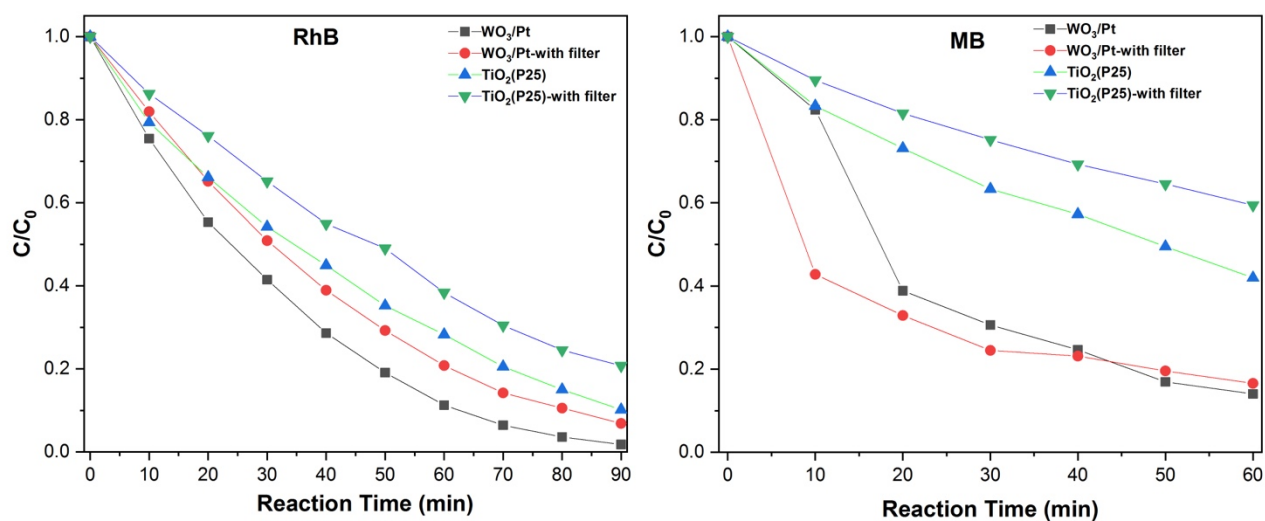

**Fig. S5.** Plot of  $C/C_0$  against the solar light irradiation for RhB and MB dyes performed with the respective photocatalysts that is derived from Figure S4.  $C_0$  represents the initial dye concentration and  $C$  is the concentration of the dye solution with respect to the solar lamp exposure duration.

**Table S1.** Reaction rate constant of RhB/MB dyes with the respective photocatalysts; with or without UVB/UVC filter.

| Photocatalysts         | Reaction rate constant ( $\text{min}^{-1}$ ) |        |                      |        |
|------------------------|----------------------------------------------|--------|----------------------|--------|
|                        | Without UV (B/C) filter                      |        | With UV (B/C) filter |        |
|                        | RhB                                          | MB     | RhB                  | MB     |
| WO <sub>3</sub> /Pt    | 0.066                                        | 0.018  | 0.059                | 0.017  |
| TiO <sub>2</sub> (P25) | 0.018                                        | 0.0077 | 0.012                | 0.0055 |
